# Supplementary material
Source: HighWire-hosted journal article supplement (https://www.cmaj.ca/highwire/filestream/58940/field_highwire_adjunct_files/0/image-wells-1-at.pdf)

**Appendix 1 (as supplied by authors):** Computed tomogram of the patient's thorax showing a large lower descending thoracic aortic aneurysm measuring 7.7 by 8.8 cm, with discontinuity of the posterior wall and large extrapleural fluid collection, both suggestive of a hemorrhaging ruptured aortic aneurysm.

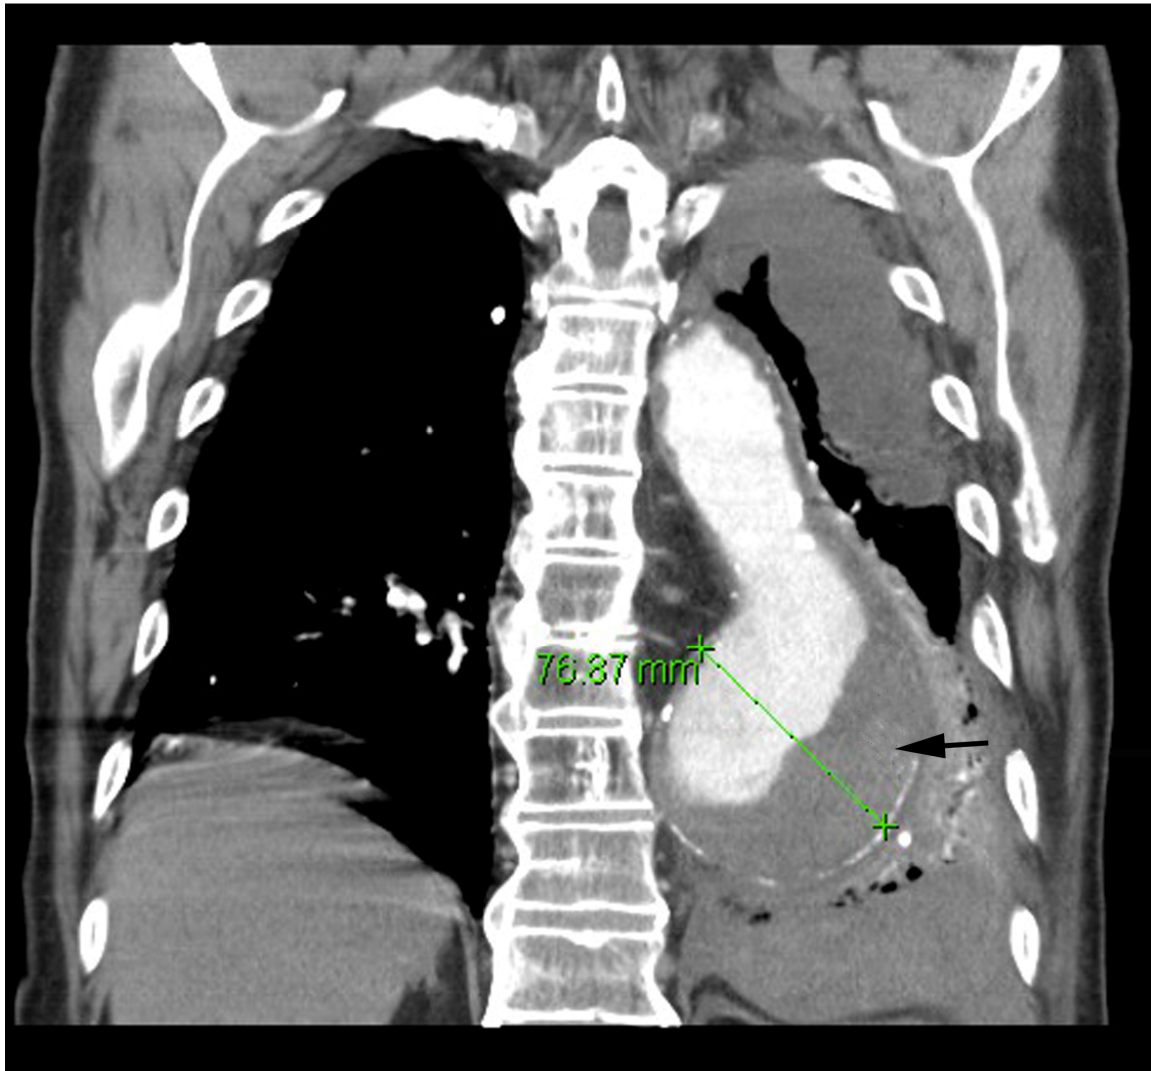

Supplement: image-wells-1-at.pdf [file image-wells-1-at.pdf]
